# Supplementary material for: CpG-coated Prussian blue nanoparticles-based photothermal therapy combined with anti-CTLA-4 immune checkpoint blockade triggers a robust abscopal effect against neuroblastoma
Source: PubMed Central journal article supplement — Transl Oncol. 2020 Jul 8;13(10):100823. doi: 10.1016/j.tranon.2020.100823 (PMC7348061; doi:10.1016/j.tranon.2020.100823), 2020-07-08
Supplement: mmc1.pdf [file mmc1.pdf]

## SUPPLEMENTARY MATERIAL

### **CpG-coated Prussian blue nanoparticles-based photothermal therapy combined with anti-CTLA-4 immune checkpoint blockade triggers a robust abscopal effect against neuroblastoma**

Juliana Cano-Mejia <sup>a,b</sup>, Anshi Shukla <sup>a</sup>, Debbie K. Ledezma <sup>b,c</sup>, Erica Palmer <sup>a</sup>, Alejandro Villagra <sup>a</sup>, Rohan Fernandes <sup>a,c,d,\*</sup>

<sup>a</sup> The George Washington Cancer Center, The George Washington University, Washington, DC 20052, USA

<sup>b</sup> Fischell Department of Bioengineering, University of Maryland, College Park MD 20742, USA

<sup>c</sup> The Institute for Biomedical Sciences, The George Washington University, Washington, DC 20037, USA

<sup>d</sup> Department of Medicine, The George Washington University, Washington, DC 20037, USA

\* Corresponding author

Email: rfernandes@gwu.edu

This document contains: **Supplementary Table S1** and **Supplementary Figure 1**

**Supplementary Table 1:** List of p-values for the *in vitro* study  
(Figure 2 of main text)

| <b>PDL-1</b>                                | <b>p-value</b> |
|---------------------------------------------|----------------|
| Vehicle vs. PBNP-PTT                        | 0.0094         |
| Laser vs. PBNP-PTT                          | 0.006          |
| PBNPs vs. PBNP-PTT                          | 0.0179         |
| CpG vs. PBNP-PTT                            | 0.0066         |
| aCTLA-4 + Laser vs. PBNP-PTT                | 0.0147         |
| <b>MHC-II</b>                               | <b>p-value</b> |
| Laser vs. PBNP-PTT + aCTLA-4                | 0.0429         |
| Laser vs CpG-PBNP-PTT + aCTLA-4             | 0.0474         |
| CpG vs. CpG-PBNP-PTT                        | 0.0082         |
| CpG vs. PBNP-PTT + aCTLA-4                  | 0.0051         |
| CpG vs. CpG-PTT + aCTLA-4                   | 0.0056         |
| aCTLA-4 + Laser vs. CpG-PBNP-PTT            | 0.0103         |
| aCTLA-4 + Laser vs. PBNP-PTT + aCTLA-4      | 0.0063         |
| aCTLA-4 + Laser vs. CpG-PBNP-PTT + aCTLA-4  | 0.007          |
| <b>B7H3</b>                                 | <b>p-value</b> |
| Vehicle vs. PBNP-PTT + aCTLA-4              | 0.0471         |
| Vehicle vs. CpG-PBNP-PTT + aCTLA-4          | 0.0239         |
| Laser vs. PBNP-PTT                          | 0.0345         |
| Laser vs. PBNP-PTT + aCTLA-4                | 0.0066         |
| Laser vs. CpG-PBNP-PTT + aCTLA-4            | 0.0033         |
| PBNPs vs. PBNP-PTT + aCTLA-4                | 0.0148         |
| PBNPs vs. CpG-PBNP-PTT + aCTLA-4            | 0.0074         |
| CpG vs. PBNP-PTT + aCTLA-4                  | 0.0123         |
| CpG vs. CpG-PBNP-PTT + aCTLA-4              | 0.0061         |
| aCTLA-4 + Laser vs. PBNP-PTT + aCTLA-4      | 0.011          |
| aCTLA-34 + Laser vs. CpG-PBNP-PTT + aCTLA-4 | 0.0055         |
| <b>CD86</b>                                 | <b>p-value</b> |
| Vehicle vs. PBNP-PTT                        | 0.0369         |
| Vehicle vs. PBNP-PTT + aCTLA-4              | 0.0176         |
| Vehicle vs. CpG-PBNP-PTT + aCTLA-4          | 0.0125         |
| Laser vs. PBNP-PTT                          | 0.0272         |
| Laser vs. PBNP-PTT + aCTLA-4                | 0.0129         |
| Laser vs CpG-PBNP-PTT + aCTLA-4             | 0.0092         |
| CpG vs. CpG-PBNP-PTT + aCTLA-4              | 0.047          |
| aCTLA-4 + Laser vs. PBNP-PTT                | 0.0206         |
| aCTLA-4 + Laser vs. PBNP-PTT + aCTLA-4      | 0.0097         |
| aCTLA-4 + Laser vs. CpG-PBNP-PTT + aCTLA-4  | 0.0069         |

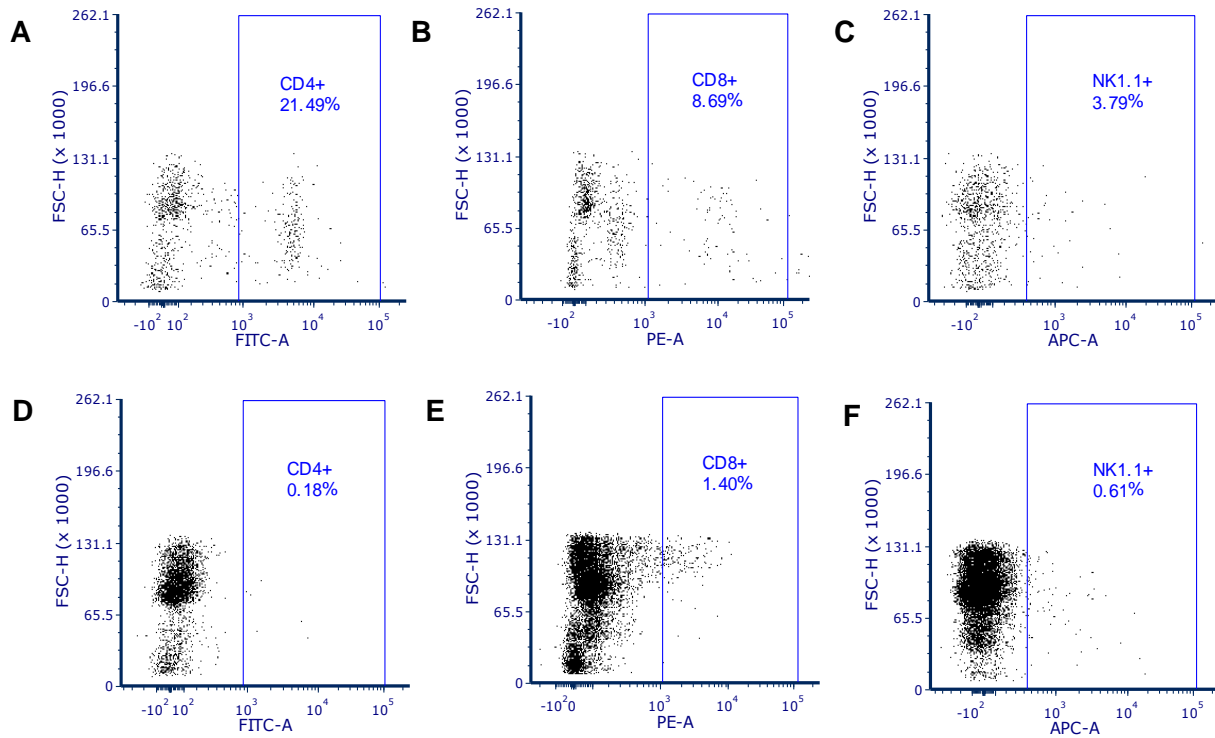

**Supplementary Figure 1.** Effectiveness of CD4+, CD8+, and NK1.1 depletion. Blood from mice that had received anti-CD4, anti-CD8, or anti-NK1.1 depletion antibodies was obtained using a nonlethal blood collection method (via the mandibular vein) after 7 rounds of depletion for flow cytometry analysis. Representative scatter plots (A) CD4+ cells, (B) CD8+ cells and (C) NK1.1+ cells in control mice (no depletion) show high percentages of cells (21.4%, 8.69% and 3.79%, respectively) compared to (D) CD4-depleted mice (0.18% CD4+), (E) CD8-depleted mice (1.40% CD8+), and (F) NK1.1-depleted mice (0.61% NK1.1+).
